# Supplementary material for: The Lion in West Africa Is Critically Endangered
Source: PLoS One. 2014 Jan 8;9(1):e83500. doi: 10.1371/journal.pone.0083500 (PMC3885426; doi:10.1371/journal.pone.0083500)
Supplement: Supporting Information S1 — The METT tracking tool – a template of the METT questionnaire. (ZIP) [file pone.0083500.s001.zip]

Archive with 5 entries (5 files):
- Henschel et al_S1.pdf
- Henschel et al_S2.docx
- Henschel et al_S5.xlsx
- Henschel et al_S4.xlsx
- Henschel et al_S3.docx
