# Supplementary material for: The Lion in West Africa Is Critically Endangered
Source: PLoS One. 2014 Jan 8;9(1):e83500. doi: 10.1371/journal.pone.0083500 (PMC3885426; doi:10.1371/journal.pone.0083500)
Supplement: Supporting Information S1 — The METT tracking tool – a template of the METT questionnaire. (ZIP) [file pone.0083500.s001.zip › Henschel et al_S5.xlsx]

## Sheet: S5
PA management characteristics	1 (B.)[1]	1 (D.)[2]	2	4	5	6 (D.)[3]	6 (K.)[4]	7	9	11	13	14	20
Lion presence[5]	A	A	CP	A	PP	PP	PP	A	A	A	A	CP	CP
Evaluation conducted by	GEF	GEF	PAPACO	PAPACO	PAPACO	PAPACO	PAPACO	PAPACO/	PAPACO	PAPACO	GEF	GEF	WCS[6]
								EOH
Year of Assessment	2009	2009	2009	2009	2009	2009	2009	2009/	2011	2011	2010	2012	2013
								2010[7]
Non-scored[8]
Annual operating budget	0	0	257742	0	0	185000	0	0	94435	13491	0	5362079	80000
(Total in US $)
Budget/km2	0	0	28.23	0	0	177.89	0	0	20.88	4.84	0	197.38	35,65
Permanent staff number	0	0	121	3	19	11	4	74	180	109	7	247	90
Staff/100 km2	0	0	1.33	0.09	1.55	1.06	0.08	0.64	3.98	3.91	0.64	0.91	4.01
Patrol Staff number	0	0	100	0	15	7	0	54	90	84	Unknown	102	30
Patrol staff/100 km2	0	0	1.1	0	1.22	0.67	0	0.47	1.99	3.01	Unknown	0.38	1.33
Scored
Current Budget	0	0	1	0	0	2	0	2	1	1	0	1	-
Security of Budget	0	0	0	0	0	0	0	0	0	0	0	Not available	-
Fees	0	0	1	0	0	0	0	0	2	2	1	2	-
Staff numbers	0	0	1	0	1	2	0	2	3	2	1	2	-
Equipment	0	0	2	0	2	3	0	1	3	1	0	1	-
Management plan	0	0	1	1	1	0	0	1	2	1	0	2	-
Annual work plan	0	0	1	0	2	0	0	1	3	0	0	2	-
Boundary demarcation	1	1	1	1	1	2	1	2	2	2	1	2	-
Law enforcement	0	0	1	0	1	2	0	1	3	1	1	2	-
Visitor Facilities	0	0	1	0	0	0	0	0	3	0	0	2	-
Research	1	0	2	0	1	0	0	1	2	0	0	2	-
Monitoring and evaluation	0	0	0	0	0	0	0	0	2	0	0	1	-
Condition assessment	1	1	1	0	0	1	0	0	2	1	0	3	-
[1] Boe National Park, Guinea
[2] Dulombi National Park, Guinea
[3] Diwasi Private Reserve, Guinea
[4] Kankan Faunal Reserve, Guinea
[5] CP = Confirmed Present, PP = Potentially Present, A = Absent
[6] Some information provided by WCS PA managerial staff; scores not available
[7] Budget and staff data from 2010 (Enhancing Our Heritage evaluation), scores from 2009 (PAPACO evaluation). Comoe has GEF funding in the pipeline, but funds had not yet been released by the 2010 EOH evaluation.
[8] For non-scored elements (budget, staff and patrol staff), the results for Kankan and Diwasi (Map ID 6) were combined, as Diwasi is a private reserve that operates within the boundaries of the Kankan PA. For scored elements it was not possible to create an overall score for Kankan and Diwasi, and so they were treated as two separate management units.
