# Supplementary material for: The Lion in West Africa Is Critically Endangered
Source: PLoS One. 2014 Jan 8;9(1):e83500. doi: 10.1371/journal.pone.0083500 (PMC3885426; doi:10.1371/journal.pone.0083500)
Supplement: Table S3 — PA attributes for the 21 PAs in this study and details on the field surveys, regarding survey methods and effort, and findings regarding the presence of lions and other species of conservation concern. (XLSX) [file pone.0083500.s004.xlsx]

## Sheet: Table S3
Map ID	PA name	Country	IUCN category	Area (km2)	Human population density (5km radius)	Year surveyed	Target species	Type of survey	Survey effort	Indicators of lion presence (or absence)	Hard evidence collected	Conclusion regarding lion occurrence	Lion pop size	Dectections of other large carnivore species	Occurrence of other mammal species of regional conservation concern	Source
1	Boé and Dulombi NPs	Guinea-Bissau	Awaiting gazettment	1943	0.1023	2010-ongoing	chimpanzee	camera trap and foot surveys	ca 1,400 camera trap days and 75 informal interviews	none	none	considered absent	n.a.	leopard	Western chimpanzee	Joost van Schijndel (www.chimbo.org), pers. comm.
2	Niokolo-Koba NP	Senegal	II	9130	0.0827	2011	lion	spoor surveys (by vehicle)	301 km of spoor transects	direct observation, observation of spoor, vocalizations	photos showing species	confirmed present	16 (0-54)	African wild dog, leopard, and spotted hyaena	elephant, Western giant eland, Western chimpanzee	this study
3	Bafing-Faleme	Mali	II, IV, none	3326	0.056	2003-2004	chimpanzee	foot surveys	3 months of field surveys	none	none	considered absent	n.a.	none confirmed	Western chimpanzee	Granier & Martinez (2004)
4	Boucle de Baoulé NP	Mali	II	5330	0.0578	2012	faunal inventory	foot surveys	add	add	add	considered absent	n.a.	add	add	Bourama Niagate, pers. comm.
5	Haut-Niger NP	Guinea	II	1228	0.0523	2009	lion	call-ins and spoor surveys (on foot)	3 months of field surveys	vocalizations reported to survey team	none	potentially still present	n.a.	leopard	Western chimpanzee	PFNH (2009)
6	Kankan Faunal Reserve	Guinea	IV	5314	0.1028	2007	faunal inventory	foot surveys	ask Dufour	one vocalization heard in 2007	none	potentially still present	n.a.	leopard	Western chimpanzee	Dufour (2008)
7	Comoé NP	Cote d'Ivoire	II	11495	0.0842	2010	lion	spoor surveys (on foot)	659 km of spoor searches in core area of NP	none	none	considered absent	n.a.	leopard, spotted hyaena	elephant, Western chimpanzee	this study
8	Bui NP	Ghana	II	1897	0.1639	2009	lion	interview survey	staff interviews*	none	none	considered absent	n.a.	not reported	not reported	this study
9	Mole NP	Ghana	II	4522	0.0809	2006-2009	lion	camera trap and spoor surveys (by vehicle and on foot) and interviews	253 camera stations running for total of 5469 trap days; 1730 km of spoor transects; interviews with staff* and in villages (n=68)	none	none	considered absent	n.a.	leopard, spotted hyaena	elephant	this study
10	Gbele Resource Reserve	Ghana	IV	544	0.0126	2008	lion	camera trap and spoor surveys (on foot) and interviews	10 camera stations running for ~350 trap days; 50 km of foot surveys; staff interviews*	none	none	considered absent	n.a.	none confirmed	none confirmed	this study
11	Digya National Park	Ghana	II	2789	0.1802	2009	lion	interview survey	staff interviews*	none	none	considered absent	n.a.	not reported	not reported	this study
12	Nazinga Game Ranch	Burkina Faso	None	970	0.1299	1985-ongoing	faunal inventory	foot surveys	570 km of foot surveys annually	none	none	considered absent	n.a.	spotted hyaena and striped hyaena	elephant	Delvingt & Vermeulen (2007)
13	Oti-Mandouri National Park	Togo	II	1100	0.5798	2003	faunal inventory	aerial surveys*	2180 km of aerial transects	aerial survey established absence of large wild herbivores	none	considered absent	n.a.	none confirmed	none confirmed	Bouché et al. (2004)
14	W-Arly-Pendjari	Benin/Burkina Faso/Niger	II, IV, VI	27167	0.2616	2012	lion	spoor surveys (by vehicle)	1,110 km of spoor transects	direct observation, observation of spoor, vocalizations	photos showing species	confirmed present	356 (246-466)	cheetah, leopard and spotted hyaena	elephant, manatee	this study
15	Mt Kouffe/Wari Maro	Benin	VI	3092	0.2465	2012	lion	consolidation of expert opinion	all senior wildlife authority staff and researchers convened	not confirmed	none	considered absent	n.a.	none confirmed	none confirmed	CENAGREF (2013)
16	Old Oyo National Park	Nigeria	II	2386	0.4766	2009	lion	interview survey	all senior staff from Old Oyo NP questioned	not confirmed	none	considered absent	n.a.	none confirmed	none confirmed	this study
17	Kainji Lake National Park	Nigeria	II	3970	0.1081	2011	lion	call-in surveys	40 call-up stations	direct observation, observation of spoor, vocalizations	photos of tracks	confirmed present	34 (23-63)	leopard, spotted hyaena	none confirmed	this study
18	Kamuku National Park	Nigeria	II	1121	0.4092	2009	lion	interview survey	21 interviews, comprising 5 park rangers, 5 hunters or former hunters, and 11 pastoralists	not confirmed	none	considered absent	n.a.	none confirmed	none confirmed	this study
19	Falgore and Lame-Burra Game Reserves	Nigeria	IV	2910	0.81	2009	lion	spoor surveys (on foot)	212 km of spoor searches in core area of NP	not confirmed	none	considered absent	n.a.	spotted hyaena	none confirmed	this study
20	Yankari Game Reserve	Nigeria	IV	2244	0.6384	2011	lion	call-in surveys and ranger-based lion monitoring	40 call-up stations and continuous ranger partol effort	direct observation, observation of spoor, vocalizations	photos of species	confirmed present	4	spotted hyaena	elephant	this study
21	Gashaka-Gumti National Park	Nigeria	II	1900	0.161	2009	lion	spoor surveys (on foot)	246 km of spoor searches in core area of NP	not confirmed	none	considered absent	n.a.	leopard	none confirmed	this study
* All PAs in Ghana had staff interviews (n=45) and a complete review of anti-poaching patrol observations
